# Supplementary material
Source: Springer Nature journal article supplement (https://www.springermedizin.de/resource/supplementary/13002_2009_160_MOESM1_ESM.pdf/9627286)
Supplement: MOESM1 [file 9627286]

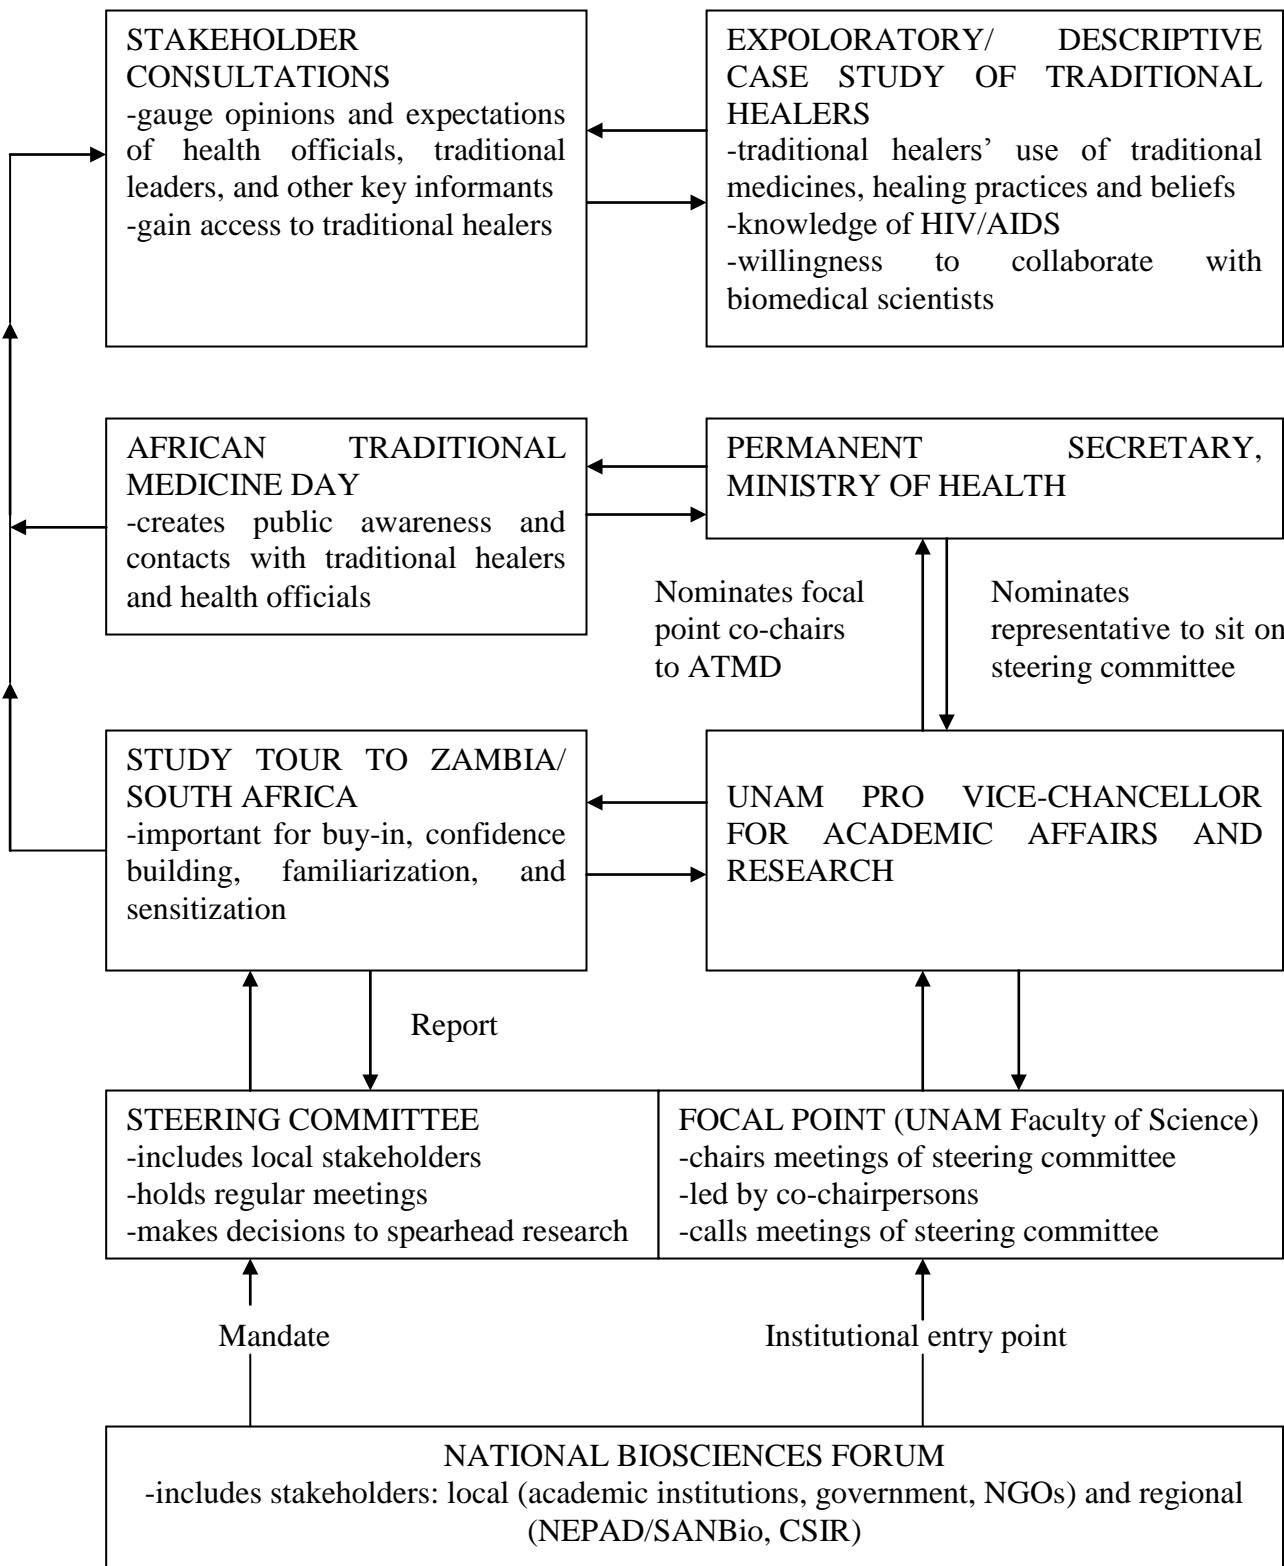

**STAKEHOLDER CONSULTATIONS**  
 -gauge opinions and expectations of health officials, traditional leaders, and other key informants  
 -gain access to traditional healers

**EXPOLORATORY/ DESCRIPTIVE CASE STUDY OF TRADITIONAL HEALERS**  
 -traditional healers' use of traditional medicines, healing practices and beliefs  
 -knowledge of HIV/AIDS  
 -willingness to collaborate with biomedical scientists

**AFRICAN TRADITIONAL MEDICINE DAY**  
 -creates public awareness and contacts with traditional healers and health officials

**PERMANENT SECRETARY, MINISTRY OF HEALTH**

Nominates focal point co-chairs to ATMD

Nominates representative to sit on steering committee

**STUDY TOUR TO ZAMBIA/ SOUTH AFRICA**  
 -important for buy-in, confidence building, familiarization, and sensitization

**UNAM PRO VICE-CHANCELLOR FOR ACADEMIC AFFAIRS AND RESEARCH**

**STEERING COMMITTEE**  
 -includes local stakeholders  
 -holds regular meetings  
 -makes decisions to spearhead research

**FOCAL POINT (UNAM Faculty of Science)**  
 -chairs meetings of steering committee  
 -led by co-chairpersons  
 -calls meetings of steering committee

Mandate

Institutional entry point

**NATIONAL BIOSCIENCES FORUM**  
 -includes stakeholders: local (academic institutions, government, NGOs) and regional (NEPAD/SANBio, CSIR)
